# Supplementary material for: Discovery of MLL1 binding units, their localization to CpG Islands, and their potential function in mitotic chromatin
Source: PubMed Central journal article supplement (PMC3890651; doi:10.1186/1471-2164-14-927), 2013-12-28

CpG-rich motifs

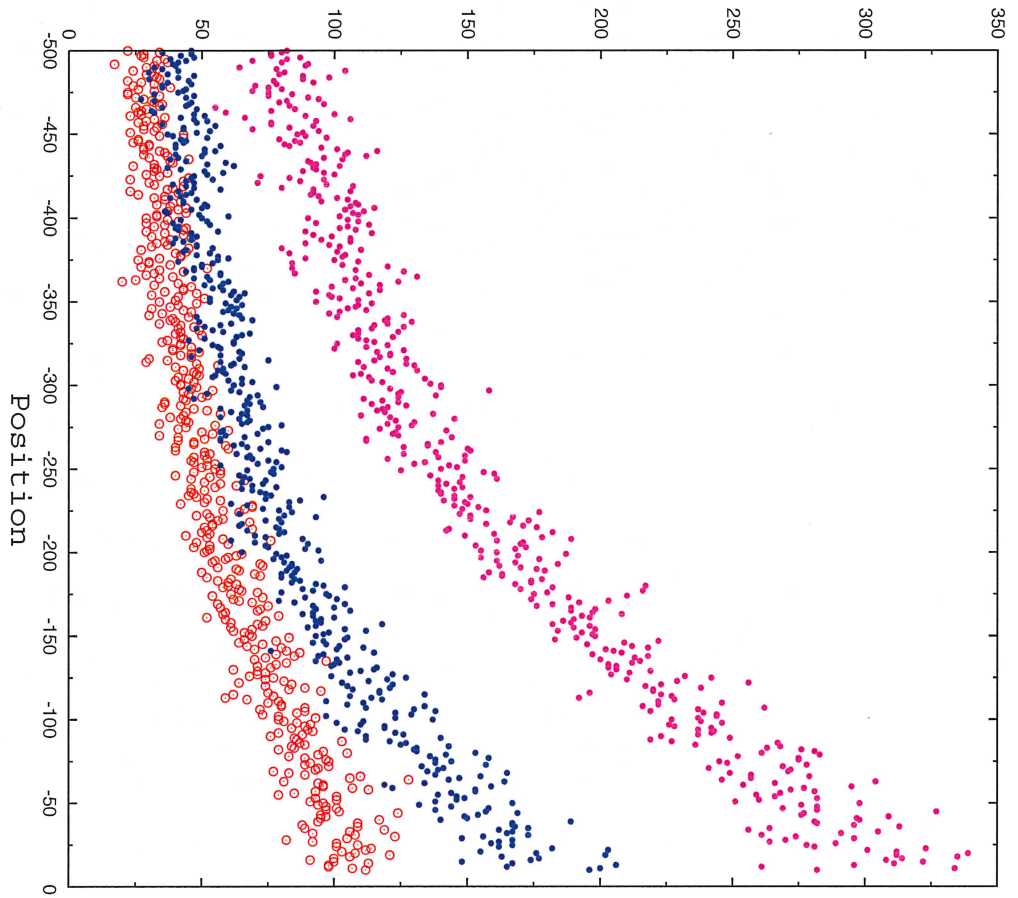

Supplement: 1471-2164-14-927-S1.pdf [file 1471-2164-14-927-S1.pdf]
