# Supplementary material for: Discovery of MLL1 binding units, their localization to CpG Islands, and their potential function in mitotic chromatin
Source: PubMed Central journal article supplement (PMC3890651; doi:10.1186/1471-2164-14-927), 2013-12-28
Supplement: 1471-2164-14-927-S2.pdf [file 1471-2164-14-927-S2.pdf]

Supplemental Table 1

Frequency of morphemes and non-motifs in promoter sequences of POLII genes

| <b>Morpheme/<br/>compl</b> | <b>Promoter/<br/>counts</b> |
|----------------------------|-----------------------------|
| CGCG                       | 27964                       |
| CGACG                      | 13178                       |
| CGGCG                      | 17440                       |
| CGTGCG                     | 3487                        |
| CGCCCG                     | 13086                       |
| CGGACG                     | 6589                        |
| CGCGCG                     | 3588                        |
| CGTACG                     | 279                         |

| <b>Non-<br/>motif/compl</b> | <b>Promoter/<br/>counts</b> |
|-----------------------------|-----------------------------|
| CGAACG                      | 665                         |
| CGACCG                      | 1823                        |
| CGAGCG                      | 4535                        |
| CGATCG                      | 568                         |
| CGGCCG                      | 10703                       |
