# Supplementary material for: Discovery of MLL1 binding units, their localization to CpG Islands, and their potential function in mitotic chromatin
Source: PubMed Central journal article supplement (PMC3890651; doi:10.1186/1471-2164-14-927), 2013-12-28
Supplement: 1471-2164-14-927-S3.pdf [file 1471-2164-14-927-S3.pdf]

Supplemental Table 2

| CHR1 to CHRY | Morpheme | Compl  | CGIs, expected counts for random occurrences | CGIs, Observed counts |
|--------------|----------|--------|----------------------------------------------|-----------------------|
| CHR1         | CGCG     |        | 278                                          | 17118                 |
| CHR1         | CGTCG    | CGACG  | 68                                           | 3390                  |
| CHR1         | CGCCG    | CGGCG  | 130                                          | 17019                 |
| CHR1         | CGCGCG   |        | 10                                           | 2231                  |
| CHR1         | CGTGCG   | CGCACG | 36                                           | 1574                  |
| CHR1         | CGCCCG   | CGGGCG | 205                                          | 5888                  |
| CHR1         | CGTCCG   | CGGACG | 32                                           | 1384                  |
| CHR1         | CGTACG   |        | 6                                            | 106                   |
| CHR2         | CGCG     |        | 183                                          | 13437                 |
| CHR2         | CGTCG    | CGACG  | 49                                           | 2481                  |
| CHR2         | CGCCG    | CGGCG  | 86                                           | 13334                 |
| CHR2         | CGCGCG   |        | 6                                            | 1703                  |
| CHR2         | CGTGCG   | CGCACG | 25                                           | 1115                  |
| CHR2         | CGCCCG   | CGGGCG | 128                                          | 4289                  |
| CHR2         | CGTCCG   | CGGACG | 21                                           | 1033                  |
| CHR2         | CGTACG   |        | 5                                            | 78                    |
| CHR3         | CGCG     |        | 105                                          | 8348                  |
| CHR3         | CGTCG    | CGACG  | 26                                           | 1630                  |
| CHR3         | CGCCG    | CGGCG  | 45                                           | 8579                  |
| CHR3         | CGCGCG   |        | 4                                            | 1143                  |
| CHR3         | CGTGCG   | CGCACG | 13                                           | 824                   |
| CHR3         | CGCCCG   | CGGGCG | 80                                           | 2767                  |
| CHR3         | CGTCCG   | CGGACG | 12                                           | 703                   |
| CHR3         | CGTACG   |        | 2                                            | 60                    |
| CHR4         | CGCG     |        | 94                                           | 7775                  |
| CHR4         | CGTCG    | CGACG  | 25                                           | 1469                  |
| CHR4         | CGCCG    | CGGCG  | 42                                           | 7818                  |
| CHR4         | CGCGCG   |        | 3                                            | 1020                  |
| CHR4         | CGTGCG   | CGCACG | 13                                           | 714                   |
| CHR4         | CGCCCG   | CGGGCG | 67                                           | 2419                  |
| CHR4         | CGTCCG   | CGGACG | 11                                           | 751                   |
| CHR4         | CGTACG   |        | 2                                            | 29                    |
| CHR5         | CGCG     |        | 119                                          | 8930                  |
| CHR5         | CGTCG    | CGACG  | 31                                           | 1735                  |
| CHR5         | CGCCG    | CGGCG  | 52                                           | 8642                  |
| CHR5         | CGCGCG   |        | 4                                            | 1089                  |
| CHR5         | CGTGCG   | CGCACG | 15                                           | 758                   |
| CHR5         | CGCCCG   | CGGGCG | 85                                           | 2807                  |
| CHR5         | CGTCCG   | CGGACG | 13                                           | 752                   |
| CHR5         | CGTACG   |        | 3                                            | 79                    |
| CHR6         | CGCG     |        | 128                                          | 8729                  |
| CHR6         | CGTCG    | CGACG  | 32                                           | 1700                  |

|       |        |        |     |       |
|-------|--------|--------|-----|-------|
| CHR6  | CGCCG  | CGGCG  | 57  | 8513  |
| CHR6  | CGCGCG |        | 5   | 1097  |
| CHR6  | CGTGCG | CGCACG | 16  | 789   |
| CHR6  | CGCCCG | CGGGCG | 88  | 2663  |
| CHR6  | CGTCCG | CGGACG | 14  | 660   |
| CHR6  | CGTACG |        | 3   | 39    |
| CHR7  | CGCG   |        | 189 | 10521 |
| CHR7  | CGTCG  | CGACG  | 49  | 1932  |
| CHR7  | CGCCG  | CGGCG  | 89  | 10130 |
| CHR7  | CGCGCG |        | 7   | 1372  |
| CHR7  | CGTGCG | CGCACG | 25  | 1014  |
| CHR7  | CGCCCG | CGGGCG | 130 | 3351  |
| CHR7  | CGTCCG | CGGACG | 21  | 878   |
| CHR7  | CGTACG |        | 4   | 70    |
| CHR8  | CGCG   |        | 113 | 7820  |
| CHR8  | CGTCG  | CGACG  | 34  | 1528  |
| CHR8  | CGCCG  | CGGCG  | 54  | 7571  |
| CHR8  | CGCGCG |        | 5   | 1257  |
| CHR8  | CGTGCG | CGCACG | 17  | 773   |
| CHR8  | CGCCCG | CGGGCG | 73  | 2502  |
| CHR8  | CGTCCG | CGGACG | 13  | 611   |
| CHR8  | CGTACG |        | 3   | 40    |
| CHR9  | CGCG   |        | 137 | 8792  |
| CHR9  | CGTCG  | CGACG  | 34  | 1705  |
| CHR9  | CGCCG  | CGGCG  | 68  | 8624  |
| CHR9  | CGCGCG |        | 4   | 1157  |
| CHR9  | CGTGCG | CGCACG | 17  | 768   |
| CHR9  | CGCCCG | CGGGCG | 99  | 2947  |
| CHR9  | CGTCCG | CGGACG | 15  | 740   |
| CHR9  | CGTACG |        | 3   | 46    |
| CHR10 | CGCG   |        | 153 | 8912  |
| CHR10 | CGTCG  | CGACG  | 41  | 1641  |
| CHR10 | CGCCG  | CGGCG  | 71  | 8653  |
| CHR10 | CGCGCG |        | 5   | 1186  |
| CHR10 | CGTGCG | CGCACG | 22  | 795   |
| CHR10 | CGCCCG | CGGGCG | 99  | 2846  |
| CHR10 | CGTCCG | CGGACG | 17  | 690   |
| CHR10 | CGTACG |        | 4   | 42    |
| CHR11 | CGCG   |        | 154 | 9312  |
| CHR11 | CGTCG  | CGACG  | 41  | 1885  |
| CHR11 | CGCCG  | CGGCG  | 77  | 8956  |
| CHR11 | CGCGCG |        | 5   | 1207  |
| CHR11 | CGTGCG | CGCACG | 22  | 931   |
| CHR11 | CGCCCG | CGGGCG | 106 | 3084  |
| CHR11 | CGTCCG | CGGACG | 17  | 827   |
| CHR11 | CGTACG |        | 4   | 61    |
| CHR12 | CGCG   |        | 138 | 7440  |

|       |        |        |     |       |
|-------|--------|--------|-----|-------|
| CHR12 | CGTCG  | CGACG  | 33  | 1513  |
| CHR12 | CGCCG  | CGGCG  | 62  | 7682  |
| CHR12 | CGCGCG |        | 5   | 985   |
| CHR12 | CGTGCG | CGCACG | 18  | 687   |
| CHR12 | CGCCCG | CGGGCG | 100 | 2503  |
| CHR12 | CGTCCG | CGGACG | 15  | 620   |
| CHR12 | CGTACG |        | 3   | 54    |
| CHR13 | CGCG   |        | 48  | 4470  |
| CHR13 | CGTCG  | CGACG  | 13  | 777   |
| CHR13 | CGCCG  | CGGCG  | 21  | 4215  |
| CHR13 | CGCGCG |        | 2   | 528   |
| CHR13 | CGTGCG | CGCACG | 6   | 371   |
| CHR13 | CGCCCG | CGGGCG | 33  | 1302  |
| CHR13 | CGTCCG | CGGACG | 5   | 338   |
| CHR13 | CGTACG |        | 1   | 31    |
| CHR14 | CGCG   |        | 81  | 5938  |
| CHR14 | CGTCG  | CGACG  | 21  | 1233  |
| CHR14 | CGCCG  | CGGCG  | 38  | 5859  |
| CHR14 | CGCGCG |        | 3   | 752   |
| CHR14 | CGTGCG | CGCACG | 11  | 501   |
| CHR14 | CGCCCG | CGGGCG | 57  | 1997  |
| CHR14 | CGTCCG | CGGACG | 9   | 445   |
| CHR14 | CGTACG |        | 2   | 31    |
| CHR15 | CGCG   |        | 93  | 6500  |
| CHR15 | CGTCG  | CGACG  | 22  | 1333  |
| CHR15 | CGCCG  | CGGCG  | 42  | 6467  |
| CHR15 | CGCGCG |        | 3   | 839   |
| CHR15 | CGTGCG | CGCACG | 12  | 553   |
| CHR15 | CGCCCG | CGGGCG | 67  | 2211  |
| CHR15 | CGTCCG | CGGACG | 10  | 523   |
| CHR15 | CGTACG |        | 2   | 45    |
| CHR16 | CGCG   |        | 238 | 9317  |
| CHR16 | CGTCG  | CGACG  | 63  | 1974  |
| CHR16 | CGCCG  | CGGCG  | 127 | 9193  |
| CHR16 | CGCGCG |        | 8   | 1110  |
| CHR16 | CGTGCG | CGCACG | 34  | 1033  |
| CHR16 | CGCCCG | CGGGCG | 157 | 3135  |
| CHR16 | CGTCCG | CGGACG | 28  | 869   |
| CHR16 | CGTACG |        | 5   | 52    |
| CHR17 | CGCG   |        | 361 | 11275 |
| CHR17 | CGTCG  | CGACG  | 81  | 2352  |
| CHR17 | CGCCG  | CGGCG  | 173 | 11108 |
| CHR17 | CGCGCG |        | 11  | 1414  |
| CHR17 | CGTGCG | CGCACG | 48  | 1078  |
| CHR17 | CGCCCG | CGGGCG | 266 | 3875  |
| CHR17 | CGTCCG | CGGACG | 37  | 967   |
| CHR17 | CGTACG |        | 7   | 66    |

|       |        |        |     |       |
|-------|--------|--------|-----|-------|
| CHR18 | CGCG   |        | 58  | 4143  |
| CHR18 | CGTCG  | CGACG  | 16  | 814   |
| CHR18 | CGCCG  | CGGCG  | 27  | 4036  |
| CHR18 | CGCGCG |        | 2   | 595   |
| CHR18 | CGTGCG | CGCACG | 8   | 421   |
| CHR18 | CGCCCG | CGGGCG | 37  | 1275  |
| CHR18 | CGTCCG | CGGACG | 6   | 350   |
| CHR18 | CGTACG |        | 2   | 21    |
| CHR19 | CGCG   |        | 645 | 13264 |
| CHR19 | CGTCG  | CGACG  | 135 | 3068  |
| CHR19 | CGCCG  | CGGCG  | 326 | 12190 |
| CHR19 | CGCGCG |        | 23  | 1655  |
| CHR19 | CGTGCG | CGCACG | 77  | 1551  |
| CHR19 | CGCCCG | CGGGCG | 481 | 4232  |
| CHR19 | CGTCCG | CGGACG | 66  | 1139  |
| CHR19 | CGTACG |        | 9   | 93    |
| CHR20 | CGCG   |        | 117 | 5663  |
| CHR20 | CGTCG  | CGACG  | 32  | 1309  |
| CHR20 | CGCCG  | CGGCG  | 58  | 5626  |
| CHR20 | CGCGCG |        | 4   | 770   |
| CHR20 | CGTGCG | CGCACG | 17  | 557   |
| CHR20 | CGCCCG | CGGGCG | 75  | 1940  |
| CHR20 | CGTCCG | CGGACG | 14  | 443   |
| CHR20 | CGTACG |        | 2   | 28    |
| CHR21 | CGCG   |        | 37  | 2493  |
| CHR21 | CGTCG  | CGACG  | 10  | 445   |
| CHR21 | CGCCG  | CGGCG  | 19  | 2269  |
| CHR21 | CGCGCG |        | 1   | 323   |
| CHR21 | CGTGCG | CGCACG | 5   | 233   |
| CHR21 | CGCCCG | CGGGCG | 23  | 744   |
| CHR21 | CGTCCG | CGGACG | 4   | 226   |
| CHR21 | CGTACG |        | 1   | 7     |
| CHR22 | CGCG   |        | 127 | 5479  |
| CHR22 | CGTCG  | CGACG  | 32  | 1121  |
| CHR22 | CGCCG  | CGGCG  | 66  | 5370  |
| CHR22 | CGCGCG |        | 4   | 704   |
| CHR22 | CGTGCG | CGCACG | 17  | 462   |
| CHR22 | CGCCCG | CGGGCG | 84  | 1948  |
| CHR22 | CGTCCG | CGGACG | 14  | 475   |
| CHR22 | CGTACG |        | 2   | 22    |
| CHRX  | CGCG   |        | 83  | 5690  |
| CHRX  | CGTCG  | CGACG  | 23  | 1425  |
| CHRX  | CGCCG  | CGGCG  | 35  | 5848  |
| CHRX  | CGCGCG |        | 3   | 714   |
| CHRX  | CGTGCG | CGCACG | 12  | 594   |
| CHRX  | CGCCCG | CGGGCG | 64  | 1787  |
| CHRX  | CGTCCG | CGGACG | 9   | 515   |

|       |        |        |      |        |
|-------|--------|--------|------|--------|
| CHRX  | CGTACG |        | 2    | 42     |
| CHRY  | CGCG   |        | 6    | 730    |
| CHRY  | CGTCG  | CGACG  | 2    | 187    |
| CHRY  | CGCCG  | CGGCG  | 3    | 618    |
| CHRY  | CGCGCG |        | 0    | 91     |
| CHRY  | CGTGCG | CGCACG | 1    | 88     |
| CHRY  | CGCCCG | CGGGCG | 5    | 190    |
| CHRY  | CGTCCG | CGGACG | 1    | 70     |
| CHRY  | CGTACG |        | 0    | 16     |
| TOTAL | CGCG   |        | 3139 | 192096 |
| TOTAL | CGTCG  | CGACG  | 804  | 38647  |
| TOTAL | CGCCG  | CGGCG  | 1477 | 188320 |
| TOTAL | CGCGCG |        | 110  | 24942  |
| TOTAL | CGTGCG | CGCACG | 420  | 18184  |
| TOTAL | CGCCCG | CGGGCG | 2208 | 62702  |
| TOTAL | CGTCCG | CGGACG | 349  | 16009  |
| TOTAL | CGTACG |        | 72   | 1158   |
