# Supplementary material for: Discovery of MLL1 binding units, their localization to CpG Islands, and their potential function in mitotic chromatin
Source: PubMed Central journal article supplement (PMC3890651; doi:10.1186/1471-2164-14-927), 2013-12-28
Supplement: 1471-2164-14-927-S4.pdf [file 1471-2164-14-927-S4.pdf]

Supplemental Table 3

| #CHR1 to<br>CHRY | non motif | compl   | CGIs,<br>expected<br>counts for<br>random<br>occurrences | CGIs,<br>Observed<br>counts |
|------------------|-----------|---------|----------------------------------------------------------|-----------------------------|
| CHR1             | CGAACG    | CGTTTCG | 15                                                       | 480                         |
| CHR1             | CGATCG    |         | 6                                                        | 163                         |
| CHR1             | CGACCG    | CGGTTCG | 14                                                       | 944                         |
| CHR1             | CGAGCG    | CGCTTCG | 27                                                       | 2160                        |
| CHR1             | CGGCCG    |         | 37                                                       | 2808                        |
| CHR2             | CGAACG    | CGTTTCG | 11                                                       | 321                         |
| CHR2             | CGATCG    |         | 4                                                        | 107                         |
| CHR2             | CGACCG    | CGGTTCG | 10                                                       | 660                         |
| CHR2             | CGAGCG    | CGCTTCG | 17                                                       | 1633                        |
| CHR2             | CGGCCG    |         | 24                                                       | 2112                        |
| CHR3             | CGAACG    | CGTTTCG | 6                                                        | 248                         |
| CHR3             | CGATCG    |         | 3                                                        | 77                          |
| CHR3             | CGACCG    | CGGTTCG | 6                                                        | 475                         |
| CHR3             | CGAGCG    | CGCTTCG | 10                                                       | 1087                        |
| CHR3             | CGGCCG    |         | 14                                                       | 1369                        |
| CHR4             | CGAACG    | CGTTTCG | 6                                                        | 175                         |
| CHR4             | CGATCG    |         | 3                                                        | 50                          |
| CHR4             | CGACCG    | CGGTTCG | 5                                                        | 388                         |
| CHR4             | CGAGCG    | CGCTTCG | 9                                                        | 911                         |
| CHR4             | CGGCCG    |         | 11                                                       | 1172                        |
| CHR5             | CGAACG    | CGTTTCG | 7                                                        | 248                         |
| CHR5             | CGATCG    |         | 3                                                        | 84                          |
| CHR5             | CGACCG    | CGGTTCG | 6                                                        | 469                         |
| CHR5             | CGAGCG    | CGCTTCG | 11                                                       | 1097                        |
| CHR5             | CGGCCG    |         | 15                                                       | 1322                        |
| CHR6             | CGAACG    | CGTTTCG | 7                                                        | 258                         |
| CHR6             | CGATCG    |         | 3                                                        | 67                          |
| CHR6             | CGACCG    | CGGTTCG | 7                                                        | 432                         |
| CHR6             | CGAGCG    | CGCTTCG | 12                                                       | 1089                        |
| CHR6             | CGGCCG    |         | 16                                                       | 1368                        |
| CHR7             | CGAACG    | CGTTTCG | 10                                                       | 251                         |
| CHR7             | CGATCG    |         | 4                                                        | 98                          |
| CHR7             | CGACCG    | CGGTTCG | 10                                                       | 498                         |
| CHR7             | CGAGCG    | CGCTTCG | 17                                                       | 1282                        |
| CHR7             | CGGCCG    |         | 25                                                       | 1678                        |
| CHR8             | CGAACG    | CGTTTCG | 7                                                        | 179                         |
| CHR8             | CGATCG    |         | 3                                                        | 67                          |
| CHR8             | CGACCG    | CGGTTCG | 7                                                        | 376                         |

|       |        |         |    |      |
|-------|--------|---------|----|------|
| CHR8  | CGAGCG | CGCTCG  | 11 | 960  |
| CHR8  | CGGCCG |         | 15 | 1235 |
| CHR9  | CGAACG | CGTTTCG | 7  | 233  |
| CHR9  | CGATCG |         | 3  | 78   |
| CHR9  | CGACCG | CGGTTCG | 7  | 447  |
| CHR9  | CGAGCG | CGCTCG  | 13 | 1075 |
| CHR9  | CGGCCG |         | 18 | 1380 |
| CHR10 | CGAACG | CGTTTCG | 10 | 176  |
| CHR10 | CGATCG |         | 4  | 79   |
| CHR10 | CGACCG | CGGTTCG | 8  | 393  |
| CHR10 | CGAGCG | CGCTCG  | 15 | 1071 |
| CHR10 | CGGCCG |         | 19 | 1363 |
| CHR11 | CGAACG | CGTTTCG | 8  | 268  |
| CHR11 | CGATCG |         | 4  | 79   |
| CHR11 | CGACCG | CGGTTCG | 9  | 514  |
| CHR11 | CGAGCG | CGCTCG  | 16 | 1164 |
| CHR11 | CGGCCG |         | 21 | 1546 |
| CHR12 | CGAACG | CGTTTCG | 7  | 189  |
| CHR12 | CGATCG |         | 3  | 69   |
| CHR12 | CGACCG | CGGTTCG | 7  | 454  |
| CHR12 | CGAGCG | CGCTCG  | 13 | 894  |
| CHR12 | CGGCCG |         | 17 | 1274 |
| CHR13 | CGAACG | CGTTTCG | 3  | 92   |
| CHR13 | CGATCG |         | 1  | 33   |
| CHR13 | CGACCG | CGGTTCG | 2  | 214  |
| CHR13 | CGAGCG | CGCTCG  | 4  | 487  |
| CHR13 | CGGCCG |         | 6  | 678  |
| CHR14 | CGAACG | CGTTTCG | 4  | 166  |
| CHR14 | CGATCG |         | 2  | 45   |
| CHR14 | CGACCG | CGGTTCG | 4  | 324  |
| CHR14 | CGAGCG | CGCTCG  | 8  | 731  |
| CHR14 | CGGCCG |         | 10 | 959  |
| CHR15 | CGAACG | CGTTTCG | 5  | 145  |
| CHR15 | CGATCG |         | 2  | 47   |
| CHR15 | CGACCG | CGGTTCG | 5  | 339  |
| CHR15 | CGAGCG | CGCTCG  | 9  | 825  |
| CHR15 | CGGCCG |         | 11 | 1082 |
| CHR16 | CGAACG | CGTTTCG | 13 | 228  |
| CHR16 | CGATCG |         | 5  | 69   |
| CHR16 | CGACCG | CGGTTCG | 13 | 479  |
| CHR16 | CGAGCG | CGCTCG  | 26 | 1113 |
| CHR16 | CGGCCG |         | 31 | 1583 |
| CHR17 | CGAACG | CGTTTCG | 15 | 315  |
| CHR17 | CGATCG |         | 8  | 117  |
| CHR17 | CGACCG | CGGTTCG | 17 | 609  |
| CHR17 | CGAGCG | CGCTCG  | 33 | 1438 |
| CHR17 | CGGCCG |         | 44 | 1932 |

|       |        |         |     |       |
|-------|--------|---------|-----|-------|
| CHR18 | CGAACG | CGTTTCG | 3   | 104   |
| CHR18 | CGATCG |         | 1   | 33    |
| CHR18 | CGACCG | CGGTTCG | 3   | 207   |
| CHR18 | CGAGCG | CGCTTCG | 5   | 517   |
| CHR18 | CGGCCG |         | 7   | 699   |
| CHR19 | CGAACG | CGTTTCG | 21  | 377   |
| CHR19 | CGATCG |         | 11  | 124   |
| CHR19 | CGACCG | CGGTTCG | 31  | 688   |
| CHR19 | CGAGCG | CGCTTCG | 55  | 1495  |
| CHR19 | CGGCCG |         | 85  | 2028  |
| CHR20 | CGAACG | CGTTTCG | 6   | 148   |
| CHR20 | CGATCG |         | 3   | 57    |
| CHR20 | CGACCG | CGGTTCG | 7   | 314   |
| CHR20 | CGAGCG | CGCTTCG | 11  | 703   |
| CHR20 | CGGCCG |         | 17  | 980   |
| CHR21 | CGAACG | CGTTTCG | 2   | 73    |
| CHR21 | CGATCG |         | 1   | 23    |
| CHR21 | CGACCG | CGGTTCG | 2   | 118   |
| CHR21 | CGAGCG | CGCTTCG | 3   | 263   |
| CHR21 | CGGCCG |         | 5   | 316   |
| CHR22 | CGAACG | CGTTTCG | 5   | 134   |
| CHR22 | CGATCG |         | 2   | 54    |
| CHR22 | CGACCG | CGGTTCG | 7   | 279   |
| CHR22 | CGAGCG | CGCTTCG | 13  | 618   |
| CHR22 | CGGCCG |         | 17  | 915   |
| CHRX  | CGAACG | CGTTTCG | 5   | 191   |
| CHRX  | CGATCG |         | 2   | 54    |
| CHRX  | CGACCG | CGGTTCG | 4   | 363   |
| CHRX  | CGAGCG | CGCTTCG | 8   | 759   |
| CHRX  | CGGCCG |         | 11  | 873   |
| CHRY  | CGAACG | CGTTTCG | 1   | 20    |
| CHRY  | CGATCG |         | 0   | 12    |
| CHRY  | CGACCG | CGGTTCG | 0   | 25    |
| CHRY  | CGAGCG | CGCTTCG | 1   | 66    |
| CHRY  | CGGCCG |         | 1   | 98    |
| TOTAL | CGAACG | CGTTTCG | 172 | 5019  |
| TOTAL | CGATCG |         | 74  | 1686  |
| TOTAL | CGACCG | CGGTTCG | 165 | 10009 |
| TOTAL | CGAGCG | CGCTTCG | 298 | 23438 |
| TOTAL | CGGCCG |         | 404 | 30770 |
